# Supplementary material for: Effects of Ai-Chi Practice on Balance and Left Cerebellar Activation during High Working Memory Load Task in Older People: A Controlled Pilot Trial
Source: MDPI journal article supplement (doi:10.3390/ijerph182312756), 2021-12-03
Supplement: s1 [file s1]

**Supplementary Table S1. Illustration \* of the Intervention Protocol (16 Ai-Chi movements).**

|                                        |                                                                                                                                                                           |
|----------------------------------------|---------------------------------------------------------------------------------------------------------------------------------------------------------------------------|
| <p>1. Contemplating<br/>(X5 times)</p> |      |
| <p>2. Floating<br/>(X5 times)</p>      |   |

3. Uplifting  
(X5 times)

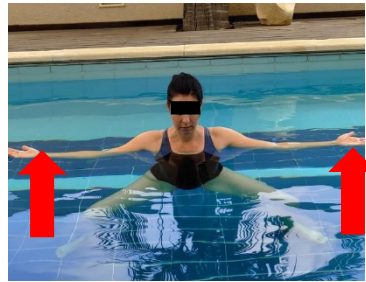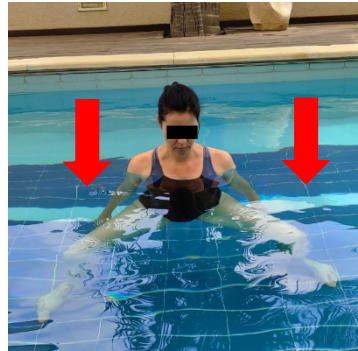

4. Enclosing  
(X5 times)

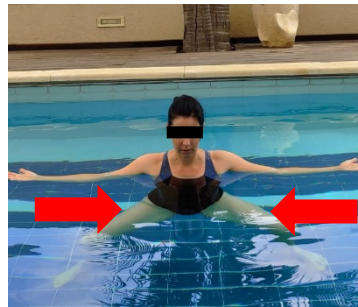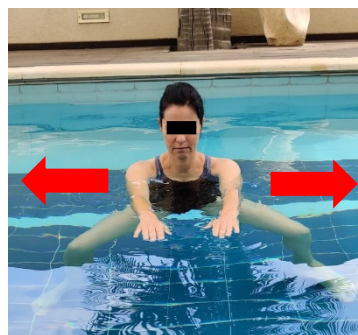

5. Folding  
(X5 times)

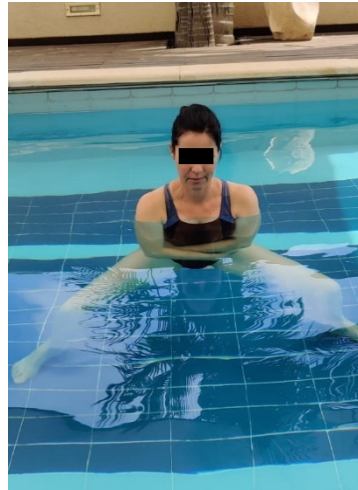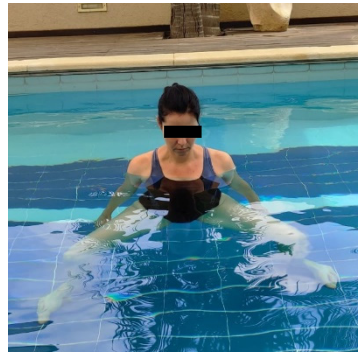

6. Soothing  
(X3 times right &  
X3 times left)

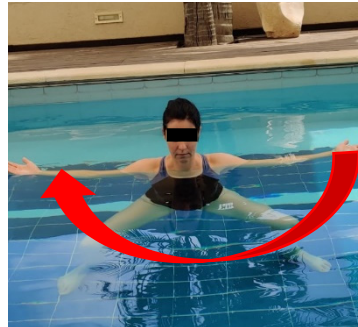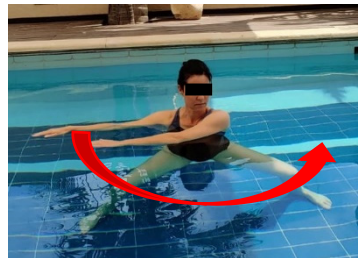

7. Gathering  
(X3 times right &  
X3 times left)

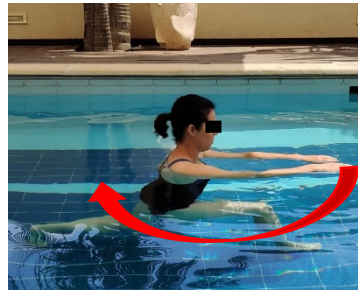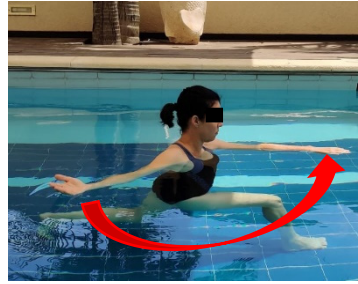

8. Freeing  
(X3 times right &  
X3 times left)

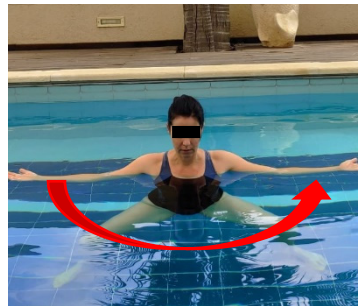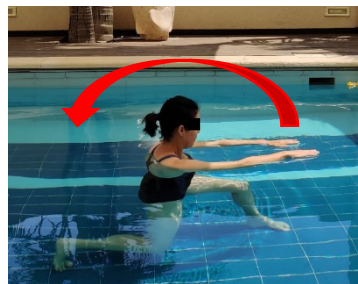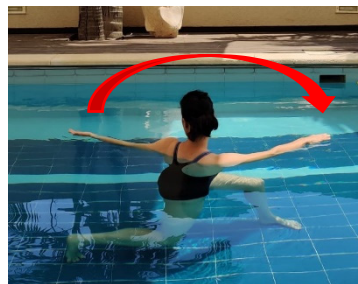

|                                                                   |                                                                                                                                                                          |
|-------------------------------------------------------------------|--------------------------------------------------------------------------------------------------------------------------------------------------------------------------|
| <p>9. Shifting<br/>(X3 times right &amp;<br/>X3 times left)</p>   | 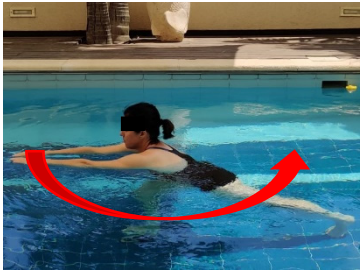     |
| <p>10. Accepting<br/>(X3 times right &amp;<br/>X3 times left)</p> |   |
| <p>14. Encircling<br/>(X3 times right &amp; X3 times left)</p>    |                                                                                      |



|                                                                 |                                                                                                                                                                           |
|-----------------------------------------------------------------|---------------------------------------------------------------------------------------------------------------------------------------------------------------------------|
|                                                                 |                                                                                         |
| <p>15. Surrounding<br/>(X3 times right &amp; X3 times left)</p> | <br> |
| <p>16. Nurturing<br/>(X3 times right &amp; X3 times left)</p>   |                                                                                       |

\* The photos attached to this intervention protocol are an illustration of the intervention protocol and include a person that did not participate in this study. The person is a professional hydrotherapist who agreed to present the movements of the intervention protocol specifically for the purpose of this manuscript.
